# Supplementary material
Source: MDPI journal article supplement (https://www.mdpi.com/2073-4441/12/9/2452)
Supplement: s1 [file s1]

# **Spatial and Temporal Patterns of Macroinvertebrate Assemblages in the River Po Catchment (Northern Italy)**

**Riccardo Fornaroli<sup>1</sup>, James C. White<sup>2</sup>, Angela Boggero<sup>1</sup>, Alex Laini<sup>3</sup>**

<sup>1</sup> CNR - Water Research Institute (IRSA), Corso Tonolli 50, 28922 Verbania, Italy

<sup>2</sup> River Restoration Centre, Cranfield University, Cranfield, Bedfordshire MK43 0AL, UK

<sup>3</sup> University of Parma - Department of Chemistry, Life Sciences and Environmental Sustainability, Parco Area delle Scienze 11/a, 43124 Parma, Italy

**Table S1** Macroinvertebrate functional traits examined within this study, with biological traits in non-italicized text and ecological traits being italicized.

| <b>Grouping feature</b>            | <b>Trait</b>                                 |
|------------------------------------|----------------------------------------------|
| <i>Longitudinal distribution</i>   | <i>crenon</i>                                |
|                                    | <i>epirithron</i>                            |
|                                    | <i>metarithron</i>                           |
|                                    | <i>hyporithron</i>                           |
|                                    | <i>epipotamon</i>                            |
|                                    | <i>metapotamon</i>                           |
|                                    | <i>outside river system</i>                  |
| <i>Transversal distribution</i>    | <i>river channel</i>                         |
|                                    | <i>banks, connected side-arms</i>            |
|                                    | <i>ponds, pools, disconnected side-arms</i>  |
|                                    | <i>marshes, peat bogs</i>                    |
|                                    | <i>temporary waters</i>                      |
|                                    | <i>lakes</i>                                 |
|                                    | <i>groundwaters</i>                          |
| <i>Altitudinal preferences</i>     | <i>lowlands (&lt; 1000 m)</i>                |
|                                    | <i>piedmont level (1000 - 2000 m)</i>        |
|                                    | <i>alpine level (&gt; 2000 m)</i>            |
| <i>Substrate preference</i>        | <i>flags/boulders/cobbles/pebbles</i>        |
|                                    | <i>gravel</i>                                |
|                                    | <i>sand</i>                                  |
|                                    | <i>silt</i>                                  |
|                                    | <i>macrophytes</i>                           |
|                                    | <i>microphytes</i>                           |
|                                    | <i>twigs/roots</i>                           |
|                                    | <i>organic detritus/litter</i>               |
|                                    | <i>mud</i>                                   |
| <i>Current velocity preference</i> | <i>null (&lt; 0.05 m*s<sup>-1</sup>)</i>     |
|                                    | <i>slow (0.05 – 0.25 m*s<sup>-1</sup>)</i>   |
|                                    | <i>medium (0.25 – 0.50 m*s<sup>-1</sup>)</i> |
|                                    | <i>fast (&gt; 0.50 m*s<sup>-1</sup>)</i>     |
| <i>Temperature preference</i>      | <i>psychrophilic (&lt; 15°C)</i>             |
|                                    | <i>thermophilic (&gt; 15°C)</i>              |
|                                    | <i>eurythermic</i>                           |
| <i>pH preference</i>               | <i>pH less than 4</i>                        |
|                                    | <i>pH between 4 and 4.5</i>                  |
|                                    | <i>pH between 4.5 and 5</i>                  |
|                                    | <i>pH between 5 and 5.5</i>                  |
|                                    | <i>pH between 5.5 and 6</i>                  |
|                                    | <i>pH greater than 6</i>                     |
| <i>Salinity preference</i>         | <i>fresh water</i>                           |
|                                    | <i>brackish water</i>                        |
| <i>Saprobic preference</i>         | <i>xenosaprobic</i>                          |
|                                    | <i>oligosaprobic</i>                         |
|                                    | <i>b-mesosaprobic</i>                        |
|                                    | <i>a-mesosaprobic</i>                        |
|                                    | <i>polysaprobic</i>                          |

**Table S1** (continued) Macroinvertebrate functional traits examined within this study, with biological traits in non-italicized text and ecological traits being italicized.

| Grouping feature                  | Trait                                |
|-----------------------------------|--------------------------------------|
| <i>Trophic status preference</i>  | <i>oligotrophic</i>                  |
|                                   | <i>mesotrophic</i>                   |
|                                   | <i>eutrophic</i>                     |
| Food                              | fine sediment + microorganisms       |
|                                   | fine detritus ( $\leq 1\text{mm}$ )  |
|                                   | dead plant ( $> 1\text{mm}$ )        |
|                                   | living microphytes                   |
|                                   | living macrophytes                   |
|                                   | dead animal ( $> 1\text{mm}$ )       |
|                                   | living microinvertebrates            |
|                                   | living macroinvertebrates            |
|                                   | vertebrates                          |
| Feeding habits                    | absorber                             |
|                                   | deposit feeder                       |
|                                   | shredder                             |
|                                   | scraper                              |
|                                   | filter-feeder                        |
|                                   | piercer (plants or animals)          |
|                                   | predator (carver/engulfer/swallower) |
|                                   | parasite                             |
| Locomotion and substrate relation | flier                                |
|                                   | surface swimmer                      |
|                                   | full water swimmer                   |
|                                   | crawler                              |
|                                   | burrower (epibenthic)                |
|                                   | interstitial (endobenthic)           |
|                                   | temporarily attached                 |
|                                   | permanently attached                 |
| Respiration                       | tegument                             |
|                                   | gill                                 |
|                                   | plastron                             |
|                                   | spiracle (aerial)                    |
|                                   | hydrostatic vesicle (aerial)         |
| Maximal potential size            | $\leq 0.25\text{ cm}$                |
|                                   | $> 0.25 - 0.5\text{ cm}$             |
|                                   | $> 0.5 - 1\text{ cm}$                |
|                                   | $> 1 - 2\text{ cm}$                  |
|                                   | $> 2 - 4\text{ cm}$                  |
|                                   | $> 4 - 8\text{ cm}$                  |
|                                   | $> 8\text{ cm}$                      |
| Resistance forms                  | eggs, gemmula, statoblasts           |
|                                   | cocoons                              |
|                                   | housings against desiccation         |
|                                   | diapause or dormancy                 |
|                                   | none                                 |

**Table S1** (continued) Macroinvertebrate functional traits examined within this study, with biological traits in non-italicized text and ecological traits being italicized.

| Grouping feature                    | Trait                                             |
|-------------------------------------|---------------------------------------------------|
| Dispersal                           | aquatic passive                                   |
|                                     | aquatic active                                    |
|                                     | aerial passive                                    |
|                                     | aerial active                                     |
| Aquatic stages                      | egg                                               |
|                                     | larva                                             |
|                                     | nymph / pupa                                      |
|                                     | adult                                             |
| Life cycle duration                 | $\leq 1$ year                                     |
|                                     | $> 1$ year                                        |
| Potential number of cycles per year | life cycle lasts at least two years (semivoltine) |
|                                     | one generation per year (monovoltine)             |
|                                     | more than two generations per year (polyvoltine)  |
| Reproduction                        | ovoviviparity                                     |
|                                     | isolated eggs, free                               |
|                                     | isolated eggs, cemented                           |
|                                     | clutches, cemented or fixed                       |
|                                     | clutches, free                                    |
|                                     | clutches, in vegetation                           |
|                                     | clutches, terrestrial                             |
|                                     | asexual reproduction                              |

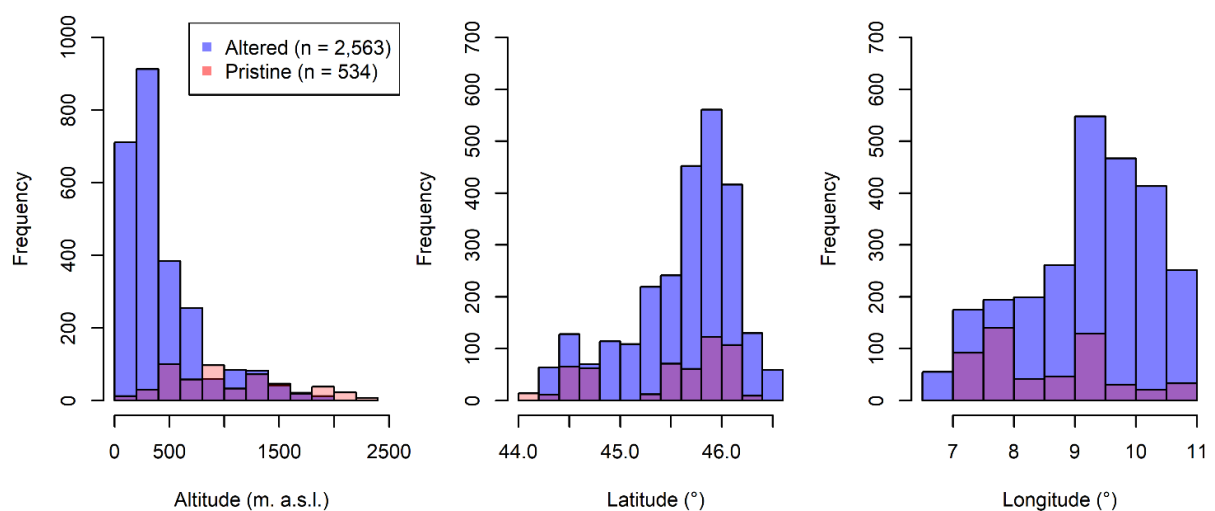

**Figure S1** Distribution of pristine and altered sites along the geographic gradients.

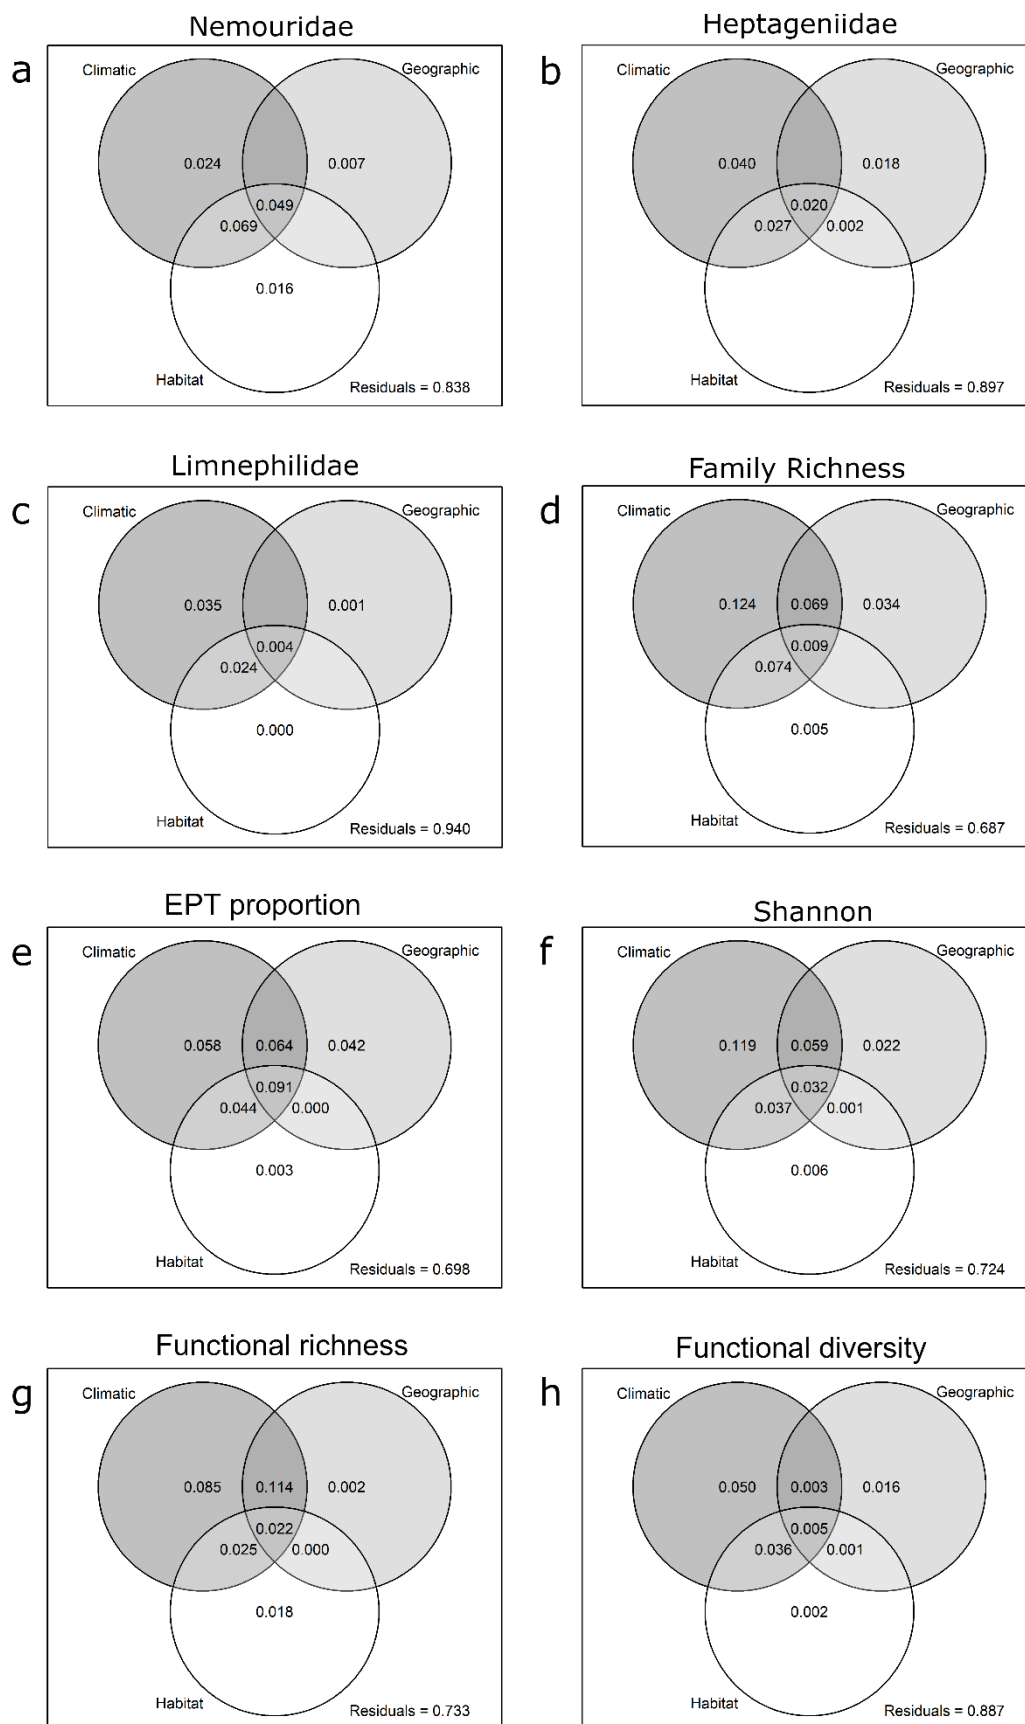

**Figure S2** Results of variance partitioning on macroinvertebrate metrics and indices. Values displayed are the adjusted  $R^2$  and negative values are not shown. The unexplained portion is shown in the bottom right of panels (Residuals).

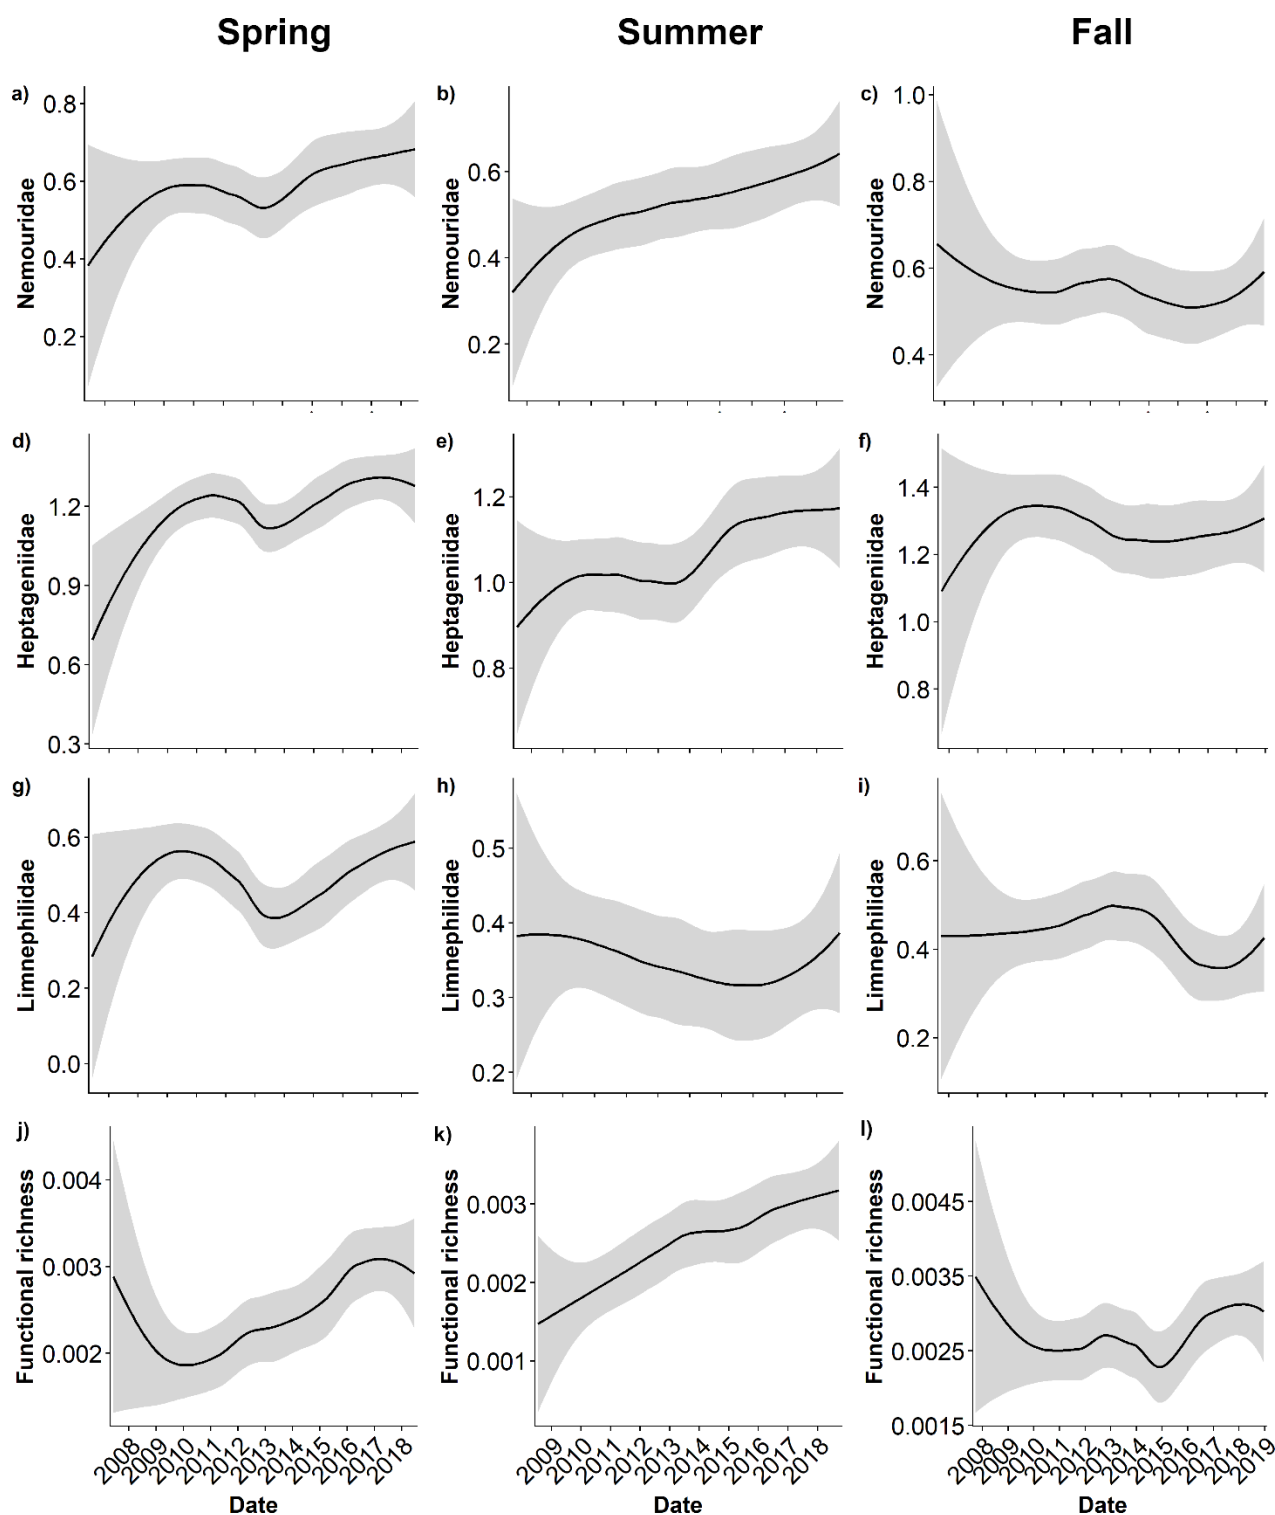

**Figure S3** Temporal trajectories of (a, b, c) log<sub>10</sub> transformed Nemouridae absolute abundance, (d, e, f) log<sub>10</sub> transformed Heptageniidae absolute abundance, (g, h, i) log<sub>10</sub> transformed Limnephilidae absolute abundance and (j, k, l) Functional Richness visualized using LOESS (Locally Estimated Scatterplot Smoothing) for the different seasons.
